# Supplementary material for: Pure-silica ZSM-22 zeolite rapidly synthesized by novel ionic liquid-directed dry-gel conversion
Source: Royal Society of Chemistry journal article supplement (doi:10.1039/c4ra07627c), 2014-01-01
Supplement: c4ra07627c1.pdf [file c4ra07627c1.pdf]

*Supporting Information*

**Pure-silica ZSM-22 Zeolite Rapidly Synthesized by Novel Ionic Liquid-directed Dry-gel-conversion**

Haimeng Wen, Yu Zhou, Jingyan Xie, Zhouyang Long, Wei Zhang, and Jun Wang\*

*State Key Laboratory of Materials-Oriented Chemical Engineering, College of Chemistry and Chemical Engineering,  
Nanjing Tech University, Nanjing 210009, China.*

\* Corresponding author, e-mail: junwang@njtech.edu.cn

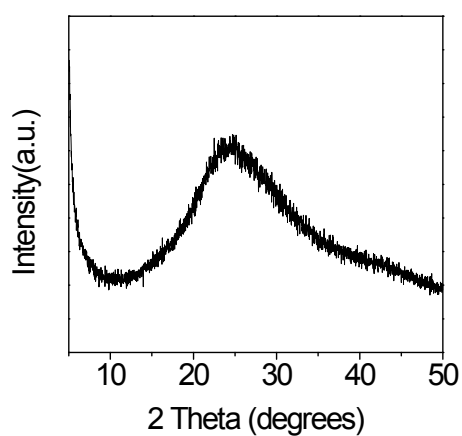

Figure S1. XRD pattern of dry gel.

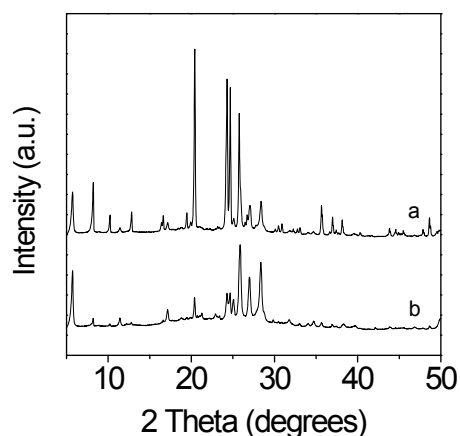

Figure S2. XRD pattern of as-synthesized sample obtained with the crystallization at 443 K for 2 days by using the gel composition of 1 SiO<sub>2</sub>: 0.15 [BMIm]Br : (a) 0.22 and (b) 0.24 Na<sub>2</sub>O: 40 H<sub>2</sub>O.

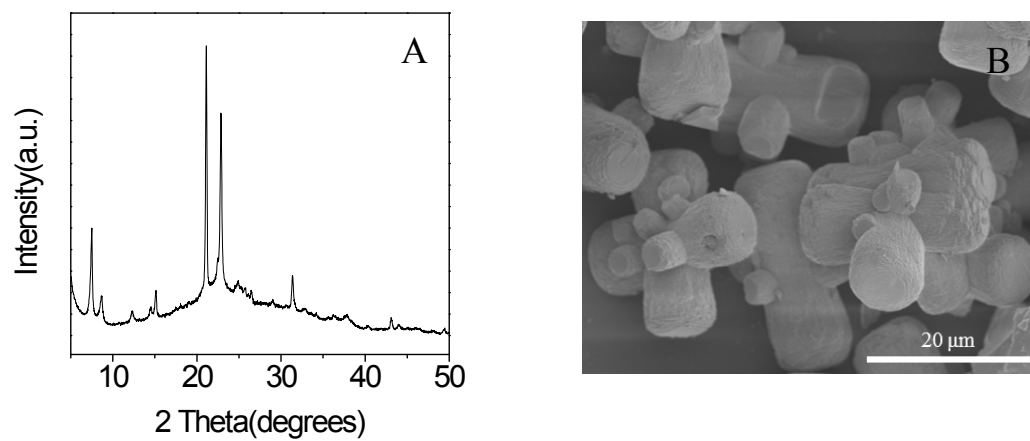

Figure S3. XRD pattern (A) and SEM image (B) of pure-silica ZSM-48 synthesized with gel dried in oven at 373 K for 3 h and crystallized at 453K for 2 days.
